# Supplementary material
Source: PubMed Central journal article supplement (PMC3009894)
Supplement: supp_M110.193292_jbc.M110.193292-1.pdf [file supp_M110.193292_jbc.M110.193292-1.pdf]

## SUPPLEMENTAL MATERIAL

**TABLE S1**

Yeast strains

| Strain                                    | Genotype                                                                                                                             | Reference  |
|-------------------------------------------|--------------------------------------------------------------------------------------------------------------------------------------|------------|
| <i>RS453</i>                              | MAT a; <i>ade2-1; his3-11,15; ura3-52; leu2-3,112; trp1-1; can1-100; GAL+</i>                                                        | Serrano,R. |
| <i>ML8-9A</i><br>(W303/RAD5)              | MAT a; <i>ADE2; BAR1; trp1-1; LYS2, RAD5, his3-11,15; leu2-3,112; ura3-1; can1-100</i>                                               | this study |
| <i>BUR1-TAP</i>                           | MAT a; <i>ade2-1; his3-11,15; ura3-52; leu2-3,112; can1-100; GAL+; BUR1-CBP-TEV-protA::TRP1-KL</i>                                   | this study |
| <i>BUR2-TAP</i>                           | MAT a; <i>ade2-1; his3-11,15; ura3-52; leu2-3,112; can1-100; GAL+; BUR2-CBP-TEV-protA::TRP1-KL</i>                                   | this study |
| <i>RFA1-TAP</i>                           | MAT a; <i>ade2-1; his3-11,15; ura3-52; leu2-3,112; can1-100; GAL+; RFA1-CBP-TEV-protA::TRP1-KL</i>                                   | this study |
| <i>PRT1-TAP</i>                           | MAT a; <i>ade2-1; his3-11,15; ura3-52; leu2-3,112; can1-100; GAL+; PRT1-CBP-TEV-protA::TRP1-KL</i>                                   | this study |
| <i>BUR1</i> shuffle                       | MAT a; <i>his3; leu2; ura3; trp1; ade2; YPR161c::kanMX4</i>                                                                          | this study |
| <i>RFA1</i> shuffle                       | MAT a; <i>ade2; his3; ura3; leu2; trp1; can1-100; GAL+; YAR007c::kanMX4</i>                                                          | this study |
| <i>BUR1 RFA1</i> shuffle                  | MAT $\alpha$ ; <i>his3; leu2; ura3; trp1; YPR161c::kanMX4YAR007c::kanMX4; pRS316-BUR1; pRS316-RFA1</i>                               | this study |
| <i>BUR1 RAD52</i> shuffle                 | Mat a; <i>his3; leu2; ura3; trp1; YPR161c::kanMX4; YML032c::kanMX4</i>                                                               | this study |
| <i>RFA1-RFP</i>                           | MAT $\alpha$ ; <i>his3; leu2; ura3; trp1; YPR161c::kanMX4YAR007c::kanMX4; pRS315-BUR1; pRS415-RFA1-RFP</i>                           | this study |
| <i>RFA1-RFP bur1-101</i>                  | MAT $\alpha$ ; <i>his3; leu2; ura3; trp1; YPR161c::kanMX4YAR007c::kanMX4; pRS315-bur1-101; pRS415-RFA1-RFP</i>                       | this study |
| <i>RFA1-RFP bur1-104</i>                  | MAT $\alpha$ ; <i>his3; leu2; ura3; trp1; YPR161c::kanMX4YAR007c::kanMX4; pRS315-bur1-104; pRS415-RFA1-RFP</i>                       | this study |
| <i>RFA1-RFP bur1-107</i>                  | MAT $\alpha$ ; <i>his3; leu2; ura3; trp1; YPR161c::kanMX4YAR007c::kanMX4; pRS315-bur1-107; pRS415-RFA1-RFP</i>                       | this study |
| <i>RFA1-RFP bur1-124</i>                  | MAT $\alpha$ ; <i>his3; leu2; ura3; trp1; YPR161c::kanMX4YAR007c::kanMX4; pRS315-bur1-124; pRS415-RFA1-RFP</i>                       | this study |
| <i>RFA1-RFP bur1-<math>\Delta</math>C</i> | MAT $\alpha$ ; <i>his3; leu2; ura3; trp1; YPR161c::kanMX4YAR007c::kanMX4; pRS315-bur1<math>\Delta</math>C-TADH1; pRS415-RFA1-RFP</i> | this study |
| <i>bur1-101::LEU2</i>                     | MAT a; <i>ade2-1, his3-11,15, ura3-52,112, trp1-1, can1-100; bur1-101::LEU2</i>                                                      | this study |
| <i>bur1-104::LEU2</i>                     | MAT a; <i>ade2-1, his3-11,15, ura3-52,112, trp1-1, can1-100; bur1-104::LEU2</i>                                                      | this study |

|                                 |                                                                                                                                 |            |
|---------------------------------|---------------------------------------------------------------------------------------------------------------------------------|------------|
| <i>bur1-107::LEU2</i>           | MAT a; <i>ade2-1, his3-11,15, ura3-52,112, trp1-1, can1-100; bur1-107::LEU2</i>                                                 | this study |
| <i>bur1-124::LEU2</i>           | MAT a; <i>ade2-1, his3-11,15, ura3-52,112, trp1-1, can1-100; bur1-124::LEU2</i>                                                 | this study |
| <i>BUR1 MSH6</i> shuffle        | MAT α; <i>his3; leu2; ura3; trp1; ade2; YPR161c::kanMX4; YDR097c::kanMX4; pRS316-BUR1; pRS316-MSH6</i>                          | this study |
| <i>BUR1 POL4</i> shuffle        | MAT a; <i>his3; leu2; ura3; trp1; ade2; YPR161c::kanMX4; YCR014c::kanMX4, pRS316-BUR1; pRS316-POL4</i>                          | this study |
| <i>BUR1 RAD16</i> shuffle       | MAT α; <i>his3; leu2; ura3; trp1; ade2; YPR161c::kanMX4; YBR114w::kanMX4; pRS316-BUR1; pRS316-RAD16</i>                         | this study |
| <i>BUR1 RAD26</i> shuffle       | MAT α; <i>his3; leu2; ura3; trp1; YJR035w::kanMX4; YPR161c::kanMX4; pRS316-BUR1; pRS316-RAD26</i>                               | this study |
| <i>BUR1 RAD16 rad26</i> shuffle | MAT α; <i>his3; leu2; ura3; trp1; YJR035w::kanMX4; YPR161c::kanMX4; YBR114w::HIS3; pRS316-BUR1; pRS316-RAD16</i>                | this study |
| <i>bur1-107 XRS2</i> shuffle    | MAT a; <i>his3; leu2; ura3; YDR369c::kanMX4; bur1-107::LEU2; pRS316-XRS2</i>                                                    | this study |
| <i>BUR1 APN1</i> shuffle        | MAT a; <i>his3; leu2; ura3; YPR161c::kanMX4; YKL114c::kanMX4; pRS316-BUR1; pRS316-APN1</i>                                      | this study |
| <i>BUR1 MAG1</i> shuffle        | MAT α; <i>his3; leu2; ura3; trp1; YPR161c::kanMX4; YER142c::kanMX4; pRS316-BUR1; pRS316-MAG1</i>                                | this study |
| <i>BUR1 RNR1</i> shuffle        | MAT a; <i>his3; leu2; ura3; trp1; ade2; YPR161c::kanMX4; YER070w::kanMX4; pRS316-BUR1; pRS316-RNR1</i>                          | this study |
| <i>Δsml1</i>                    | MAT α; <i>ADE2; BARI; trp1-1; lys2Δ; RAD5; sml1::HIS3; his3-11,15; leu2-3,112; ura3-1; can1-100</i>                             | this study |
| <i>NEB191-10B (Δmec1 Δsml1)</i> | MAT α; <i>ADE2; BARI; trp1-1; lys2Δ; RAD5; mec1::TRP1; sml1::HIS3; his3-11,15; leu2-3,112; ura3-1; can1-100</i>                 | this study |
| <i>Δsml1 bur1-107</i>           | MAT α; <i>ADE2; BARI; trp1-1; lys2Δ; RAD5; sml1::HIS3; bur1-107::LEU2; his3-11,15; leu2-3,112; ura3-1; can1-100</i>             | this study |
| <i>Δmec1 Δsml1 bur1-107</i>     | MAT α; <i>ADE2; BARI; trp1-1; lys2Δ; RAD5; mec1::TRP1; sml1::HIS3; bur1-107::LEU2; his3-11,15; leu2-3,112; ura3-1; can1-100</i> | this study |

**TABLE S2**

Plasmids

| Plasmid             | Description                                                                                                      | Reference  |
|---------------------|------------------------------------------------------------------------------------------------------------------|------------|
| pRS315- <i>BUR1</i> | a Sall-ScaI fragment of a genomic clone containing <i>BUR1</i> was cloned into the Sall and SmaI sites of pRS315 | this study |
| pRS316- <i>BUR1</i> | a Sall-NotI fragment was subcloned from pRS315- <i>BUR1</i> into pRS316                                          | this study |

|                                                 |                                                                                                                                                                                                                             |            |
|-------------------------------------------------|-----------------------------------------------------------------------------------------------------------------------------------------------------------------------------------------------------------------------------|------------|
| pRS315- <i>bur1-101</i>                         | as pRS315- <i>BURI</i> but carrying <i>bur1-101</i>                                                                                                                                                                         | this study |
| pRS315- <i>bur1-104</i>                         | as pRS315- <i>BURI</i> but carrying <i>bur1-104</i>                                                                                                                                                                         | this study |
| pRS315- <i>bur1-107</i>                         | as pRS315- <i>BURI</i> but carrying <i>bur1-107</i>                                                                                                                                                                         | this study |
| pRS315- <i>bur1-124</i>                         | as pRS315- <i>BURI</i> but carrying <i>bur1-124</i>                                                                                                                                                                         | this study |
| pRS313- <i>bur1-101</i>                         | as pRS313- <i>BURI</i> but carrying <i>bur1-101</i>                                                                                                                                                                         | this study |
| pRS313- <i>bur1-104</i>                         | as pRS313- <i>BURI</i> but carrying <i>bur1-104</i>                                                                                                                                                                         | this study |
| pRS313- <i>bur1-107</i>                         | as pRS313- <i>BURI</i> but carrying <i>bur1-107</i>                                                                                                                                                                         | this study |
| pRS313- <i>bur1-124</i>                         | as pRS313- <i>BURI</i> but carrying <i>bur1-124</i>                                                                                                                                                                         | this study |
| pRS314- <i>bur1-101</i>                         | as pRS314- <i>BURI</i> but carrying <i>bur1-101</i>                                                                                                                                                                         | this study |
| pRS314- <i>bur1-104</i>                         | as pRS314- <i>BURI</i> but carrying <i>bur1-104</i>                                                                                                                                                                         | this study |
| pRS314- <i>bur1-107</i>                         | as pRS314- <i>BURI</i> but carrying <i>bur1-107</i>                                                                                                                                                                         | this study |
| pRS314- <i>bur1-124</i>                         | as pRS314- <i>BURI</i> but carrying <i>bur1-124</i>                                                                                                                                                                         | this study |
| pRS314- <i>RFAI</i>                             | <i>RFAI</i> (including ~500 bp 5' and ~130 bp 3') was amplified from genomic DNA introducing BamHI and XhoI sites and cloned into the same sites of pRS314                                                                  | this study |
| pRS316- <i>RFAI</i>                             | <i>RFAI</i> (including ~500 bp 5' and ~130 bp 3') was amplified from genomic DNA introducing BamHI and XhoI sites and cloned into the same sites of pRS316                                                                  | this study |
| pRS314- <i>rfa1-249</i>                         | as pRS314- <i>RFAI</i> but carrying <i>rfa1-249</i>                                                                                                                                                                         | this study |
| pRS15-T <sub>ADHI</sub>                         |                                                                                                                                                                                                                             | (1)        |
| pRS315-P <sub>BURI</sub> -T <sub>ADHI</sub>     | the promoter sequence of <i>BURI</i> was PCR amplified from genomic DNA adding NotI and BamHI sites and cloned into the same sites of pRS315-T <sub>ADHI</sub>                                                              | this study |
| pRS315- <i>BURI</i> -T <sub>ADHI</sub>          | the coding region of <i>BURI</i> was PCR amplified from genomic DNA adding BamHI and XhoI sites and cloned into the same sites of pRS315-P <sub>BURI</sub> -TAP-T <sub>ADHI</sub>                                           | this study |
| pRS315- <i>bur1ΔC</i> -T <sub>ADHI</sub>        | the sequence encoding the <i>BURI</i> kinase domain (aa 1 - 372) was PCR amplified from genomic DNA adding BamHI and XhoI sites and cloned into the same sites of pRS315-P <sub>BURI</sub> -T <sub>ADHI</sub>               | this study |
| pRS315- <i>bur1-C</i> -T <sub>ADHI</sub>        | the sequence encoding the <i>BURI</i> C terminus (aa 365 – 657) was PCR amplified from genomic DNA adding BamHI and XhoI sites and an ATG and cloned into the same sites of pRS315-P <sub>BURI</sub> -TAP-T <sub>ADHI</sub> | this study |
| pRS315-TAP-T <sub>ADHI</sub>                    |                                                                                                                                                                                                                             | (1)        |
| pRS315-P <sub>BURI</sub> -TAP-T <sub>ADHI</sub> | the promoter sequence of <i>BURI</i> was PCR amplified from genomic DNA adding NotI and BamHI sites and cloned into the same sites of pRS315-TAP-T <sub>ADHI</sub>                                                          | this study |
| pRS315- <i>BURI</i> -TAP-T <sub>ADHI</sub>      | the coding region of <i>BURI</i> was PCR amplified from genomic DNA adding BamHI and XhoI sites and cloned into the same sites of pRS315-P <sub>BURI</sub> -TAP-T <sub>ADHI</sub>                                           | this study |
| pRS315- <i>bur1-C</i> -TAP-T <sub>ADHI</sub>    | the sequence encoding the <i>BURI</i> C terminus (aa 365 – 657) was PCR amplified from genomic DNA adding BamHI and XhoI sites and an ATG                                                                                   | this study |

|                          |                                                                                                                                               |            |
|--------------------------|-----------------------------------------------------------------------------------------------------------------------------------------------|------------|
|                          | and cloned into the same sites of pRS315-P <sub>BURI</sub> -TAP-T <sub>ADHI</sub>                                                             |            |
| pRP1085                  |                                                                                                                                               | (2)        |
| pRS415- <i>RFAI</i> -RFP | the promoter and coding region of <i>RFAI</i> was amplified by PCR creating HindIII and BamHI and cloned into the same sites of pRP1085       | this study |
| pWJ1213                  | pRS413-based vector for expression of <i>RAD52-YFP</i> from its native promoter                                                               | (3)        |
| pRS314- <i>RAD52</i>     | <i>RAD52</i> (including ~540 bp 5' and ~130 bp 3') was amplified by PCR creating SacI and XhoI sites and cloned into the same sites of pRS315 | this study |
| pRS316- <i>RAD52</i>     | <i>RAD52</i> (including ~540 bp 5' and ~130 bp 3') was amplified by PCR creating SacI and XhoI sites and cloned into the same sites of pRS316 | this study |
| pRS315- <i>MSH6</i>      | <i>MSH6</i> (including ~500 bp 5' and ~300 bp 3') was PCR amplified creating XhoI and BamHI sites and cloned into the same sites of pRS315    | this study |
| pRS316- <i>MSH6</i>      | <i>MSH6</i> (including ~500 bp 5' and ~300 bp 3') was PCR amplified creating XhoI and BamHI sites and cloned into the same sites of pRS316    | this study |
| pRS315- <i>POL4</i>      | <i>POL4</i> (including ~500 bp 5' and ~300 bp 3') was PCR amplified creating XhoI and BamHI sites and cloned into the same sites of pRS315    | this study |
| pRS316- <i>POL4</i>      | <i>POL4</i> (including ~500 bp 5' and ~300 bp 3') was PCR amplified creating XhoI and BamHI sites and cloned into the same sites of pRS316    | this study |
| pRS315- <i>RAD16</i>     | <i>RAD16</i> (including ~500 bp 5' and ~300 bp 3') was PCR amplified creating XhoI and BamHI sites and cloned into the same sites of pRS315   | this study |
| pRS316- <i>RAD16</i>     | <i>RAD16</i> (including ~500 bp 5' and ~300 bp 3') was PCR amplified creating XhoI and BamHI sites and cloned into the same sites of pRS316   | this study |
| pRS315- <i>RAD26</i>     | <i>RAD26</i> (including ~500 bp 5' and ~300 bp 3') was PCR amplified creating SalI and BamHI sites and cloned into the same sites of pRS315   | this study |
| pRS316- <i>RAD26</i>     | <i>RAD26</i> (including ~500 bp 5' and ~300 bp 3') was PCR amplified creating SalI and BamHI sites and cloned into the same sites of pRS316   | this study |
| pRS313- <i>XRS2</i>      | <i>XRS2</i> (including ~500 bp 5' and ~300 bp 3') was PCR amplified creating BamHI and SmaI sites and cloned into the BamHI site of pRS313    | this study |
| pRS316- <i>XRS2</i>      | <i>XRS2</i> (including ~500 bp 5' and ~300 bp 3') was PCR amplified creating BamHI and SmaI sites and cloned into the BamHI site pRS316       | this study |
| pRS313- <i>APNI</i>      | <i>APNI</i> (including ~500 bp 5' and ~300 bp 3') was PCR amplified creating XhoI and BamHI and cloned into the same sites of pRS313          | this study |
| pRS316- <i>APNI</i>      | <i>APNI</i> (including ~500 bp 5' and ~300 bp 3') was PCR amplified creating XhoI and BamHI and cloned into the same sites of pRS316          | this study |
| pRS315- <i>MAGI</i>      | <i>MAGI</i> (including ~500 bp 5' and ~300 bp 3')                                                                                             | this study |

|                                 |                                                                                                                                                         |            |
|---------------------------------|---------------------------------------------------------------------------------------------------------------------------------------------------------|------------|
| pRS316- <i>MAG1</i>             | was PCR amplified creating XhoI and BamHI and cloned into the same sites of pRS315<br><i>MAG1</i> (including ~500 bp 5' and ~300 bp 3')                 | this study |
| pRS315- <i>RNR1</i>             | was PCR amplified creating XhoI and BamHI and cloned into the same sites of pRS316<br><i>RNR1</i> (including ~500 bp 5' and ~300 bp 3')                 | this study |
| pRS316- <i>RNR1</i>             | PCR amplified creating XhoI and BamHI and cloned into the same sites of pRS315<br><i>RNR1</i> (including ~500 bp 5' and ~300 bp 3')                     | this study |
| pGEX-4T-3- <i>bur1</i> -365-657 | the sequence encoding the indicated amino acids of Bur1 were amplified by PCR creating BamHI and SalI sites and cloned into the same sites of pGEX-4T-3 | this study |
| -365-500                        |                                                                                                                                                         |            |
| -365-480                        |                                                                                                                                                         |            |
| -413-500                        |                                                                                                                                                         |            |
| -540-657                        |                                                                                                                                                         |            |
| -560-657                        |                                                                                                                                                         |            |
| -500-570                        |                                                                                                                                                         |            |

**Table S3**

ORFs whose transcripts change > 2-fold in *bur1-107* compared to wild-type strains after treatment with 0.1% MMS for 1 h

| ORF     | Gene         | Fold  | Function                                                                                      |
|---------|--------------|-------|-----------------------------------------------------------------------------------------------|
| YML123C | <i>PHO84</i> | -21,0 | High-affinity inorganic phosphate (Pi) and low-affinity manganese transporter                 |
| YHR136C | <i>SPL2</i>  | -10,7 | Protein with similarity to cyclin-dependent kinase inhibitors                                 |
| YJR025C | <i>BNA1</i>  | -3,6  | 3-hydroxyanthranilic acid dioxygenase                                                         |
| YJL161W | –            | -3,0  | Putative protein of unknown function                                                          |
| YGL184C | <i>STR3</i>  | -2,9  | Cystathionine beta-lyase                                                                      |
| YNL300W | –            | -2,8  | Glycosylphosphatidylinositol-dependent cell wall protein                                      |
| YDR453C | <i>TSA2</i>  | -2,6  | Stress inducible cytoplasmic thioredoxin peroxidase                                           |
| YNL277W | <i>MET2</i>  | -2,6  | L-homoserine-O-acetyltransferase                                                              |
| YMR095C | <i>SNO1</i>  | -2,5  | Protein of unconfirmed function                                                               |
| YGL121C | <i>GPG1</i>  | -2,5  | Proposed gamma subunit of the heterotrimeric G protein that interacts with the receptor Gpr1p |
| YGL263W | <i>COS12</i> | -2,5  | Protein of unknown function                                                                   |
| YGR044C | <i>RME1</i>  | -2,4  | Zinc finger protein involved in control of meiosis                                            |
| YLR180W | <i>SAM1</i>  | -2,4  | S-adenosylmethionine synthetase                                                               |
| YJR078W | <i>BNA2</i>  | -2,4  | Tryptophan 2,3-dioxygenase                                                                    |
| YOR236W | <i>DFR1</i>  | -2,4  | Dihydrofolate reductase                                                                       |
| YGR256W | <i>GND2</i>  | -2,4  | 6-phosphogluconate dehydrogenase                                                              |
| YDR281C | <i>PHM6</i>  | -2,4  | Protein of unknown function                                                                   |
| YNL058C | –            | -2,3  | Putative protein of unknown function                                                          |
| YIR030C | <i>DCG1</i>  | -2,3  | Protein of unknown function                                                                   |
| YKR075C | –            | -2,3  | Protein of unknown function                                                                   |
| YGR108W | <i>CLB1</i>  | -2,3  | B-type cyclin involved in cell cycle progression                                              |

|           |              |      |                                                                                                   |
|-----------|--------------|------|---------------------------------------------------------------------------------------------------|
| YMR174C   | <i>PAI3</i>  | -2,3 | Cytoplasmic proteinase A (Pep4p) inhibitor<br>Protein of unassigned function involved in mutation |
| YHL006C   | <i>SHU1</i>  | -2,2 | suppression                                                                                       |
| YLR348C   | <i>DIC1</i>  | -2,2 | Mitochondrial dicarboxylate carrier                                                               |
| YHR015W   | <i>MIP6</i>  | -2,2 | Putative RNA-binding protein                                                                      |
| YAL063C-A | –            | -2,1 | Putative protein of unknown function                                                              |
| YGR109C   | <i>CLB6</i>  | -2,1 | B-type cyclin involved in DNA replication during S phase                                          |
| YGR153W   | –            | -2,1 | Putative protein of unknown function                                                              |
| YCL049C   | –            | -2,1 | Protein of unknown function                                                                       |
| YMR195W   | <i>ICY1</i>  | -2,1 | Protein of unknown function                                                                       |
| YPL256C   | <i>CLN2</i>  | -2,1 | G1 cyclin involved in regulation of the cell cycle                                                |
| YLR121C   | <i>YPS3</i>  | -2,1 | Aspartic protease                                                                                 |
| YKL218C   | <i>SRY1</i>  | -2,1 | 3-hydroxyaspartate dehydratase                                                                    |
| YGR203W   | –            | -2,1 | Putative protein                                                                                  |
| YMR096W   | <i>SNZ1</i>  | -2,1 | Protein involved in vitamin B6 biosynthesis                                                       |
| YDR126W   | <i>SWF1</i>  | -2,1 | Palmitoyltransferase                                                                              |
| YER091C   | <i>MET6</i>  | -2,1 | Cobalamin-independent methionine synthase                                                         |
| YMR069W   | <i>NAT4</i>  | -2,1 | N alpha-acetyl-transferase                                                                        |
| YHL044W   | –            | -2,0 | Putative integral membrane protein                                                                |
| YMR144W   | –            | -2,0 | Putative protein of unknown function                                                              |
| YBR147W   | –            | -2,0 | Putative protein of unknown function                                                              |
| YLR281C   | –            | -2,0 | Putative protein of unknown function                                                              |
| YFL053W   | <i>DAK2</i>  | 2,0  | Dihydroxyacetone kinase                                                                           |
| YER060W-A | <i>FCY22</i> | 2,1  | Putative purine-cytosine permease                                                                 |
| YNR044W   | <i>AGA1</i>  | 2,1  | Anchorage subunit of a-agglutinin of a-cells                                                      |
| YJR004C   | <i>SAG1</i>  | 2,3  | Alpha-agglutinin of alpha-cells                                                                   |
| YIL037C   | <i>PRM2</i>  | 2,3  | Pheromone-regulated protein                                                                       |
| YML047C   | <i>PRM6</i>  | 2,3  | Pheromone-regulated protein                                                                       |
| YNL145W   | <i>MFA2</i>  | 2,3  | Mating pheromone a-factor                                                                         |
| YCL027W   | <i>FUS1</i>  | 2,3  | Membrane protein localized to the shmoo tip                                                       |
| YFL026W   | <i>STE2</i>  | 2,4  | Receptor for alpha-factor pheromone                                                               |
| YNL018C   | –            | 2,4  | Putative protein of unknown function                                                              |
| YKL070W   | –            | 2,5  | Putative protein of unknown function                                                              |
| YMR230W-A | –            | 2,6  | Putative protein of unknown function                                                              |
| YBR040W   | <i>FIG1</i>  | 2,6  | Integral membrane protein required for efficient mating                                           |
| YNL034W   | –            | 2,8  | Putative protein of unknown function                                                              |
| YNL279W   | <i>PRM1</i>  | 2,9  | Pheromone-regulated multispinning membrane protein                                                |
| YGL032C   | <i>AGA2</i>  | 2,9  | Adhesion subunit of a-agglutinin of a-cells                                                       |
| YPR161C   | <i>BUR1</i>  | 3,3  | Cyclin (Bur2p)-dependent protein kinase                                                           |
| YDR461W   | <i>MFA1</i>  | 4,5  | Mating pheromone a-factor                                                                         |

## SUPPLEMENTAL REFERENCES

1. Rother, S., and Strasser, K. (2007) *Genes Dev* **21**, 1409-1421
2. Sheth, U., and Parker, R. (2003) *Science* **300**, 805-808
3. Feng, Q., During, L., de Mayolo, A. A., Lettier, G., Lisby, M., Erdeniz, N., Mortensen, U. H., and Rothstein, R. (2007) *DNA Repair (Amst)* **6**, 27-37
